# Supplementary material
Source: PubMed Central journal article supplement (PMC4961236)
Supplement: NIHMS69171-supplement-Supplement1.pdf [file NIHMS69171-supplement-Supplement1.pdf]

## Supplementary Appendix

This appendix has been provided by the authors to give readers additional information about their work.

Supplement to: Johnson P, Federico M, Kirkwood A, et al. Adapted treatment guided by interim PET-CT scan in advanced Hodgkin's lymphoma. *N Engl J Med* 2016;374:2419-29. DOI: 10.1056/NEJMoa1510093

## **Supplementary appendix:**

Supplement to Johnson P, Federico M, Kirkwood A. et al., Treatment adaptation guided by interim PET scanning in advanced Hodgkin lymphoma.

### **Contents:**

|                                                                                                                                      |           |
|--------------------------------------------------------------------------------------------------------------------------------------|-----------|
| Schedules and doses for BEACOPP regimens                                                                                             | Page 2    |
| Addendum to sample size calculation                                                                                                  | Page 3    |
| Figure S1: Trial schema                                                                                                              | Page 4    |
| Figure S2: Progression-free and overall survival for all patients                                                                    | Page 5    |
| Figure S3: Subgroup analysis of the effects on progression-free survival of the omission of bleomycin following negative interim PET | Page 6    |
| Supplementary Tables S1-S3                                                                                                           | Pages 7-8 |

**BEACOPP-14** (repeated every 14 days)

|                           |                                                     |          |
|---------------------------|-----------------------------------------------------|----------|
| Doxorubicin               | 25mg/m <sup>2</sup> iv                              | Day 1    |
| Cyclophosphamide          | 650mg/m <sup>2</sup> iv                             | Day 1    |
| Etoposide                 | 100mg/m <sup>2</sup> iv                             | Days 1-3 |
| Procarbazine (or Natulan) | 100mg/m <sup>2</sup> po                             | Days 1-7 |
| Prednisolone              | 80mg/m <sup>2</sup> po                              | Days 1-7 |
| Bleomycin                 | 10,000units/m <sup>2</sup> iv                       | Day 8    |
| Vincristine*              | 1.4mg/m <sup>2</sup> iv                             | Day 8    |
| G-CSF                     | 263/300mcg or equivalent PEG-Filgrastim single dose | Day 9-13 |

**BEACOPP-escalated** (repeated every 21 days)

|                           |                                                     |                             |
|---------------------------|-----------------------------------------------------|-----------------------------|
| Doxorubicin               | 35mg/m <sup>2</sup> iv                              | Day 1                       |
| Cyclophosphamide          | 1250mg/m <sup>2</sup> iv                            | Day 1                       |
| Etoposide                 | 200mg/m <sup>2</sup> iv                             | Days 1-3                    |
| Procarbazine (or Natulan) | 100mg/m <sup>2</sup> po                             | Days 1-7                    |
| Prednisolone              | 40mg/m <sup>2</sup> po                              | Days 1-14                   |
| Bleomycin                 | 10,000units/m <sup>2</sup> iv                       | Day 8                       |
| Vincristine*              | 1.4mg/m <sup>2</sup> iv                             | Day 8                       |
| G-CSF                     | 263/300mcg or equivalent PEG-Filgrastim single dose | Day 9 until count recovered |

Addendum to sample size calculation:

The original sample size was calculated using a STATA add-on module called ARTSURV. After RATHL completed recruitment, it was discovered that there was an error in this program which under-estimates sample size for non-inferiority trials.

Original calculation:

101 events required; sample size 950 randomized patients.

Revised calculation (calculated using NQuery):

91 events required; sample size 1238 randomized patients.

Figure S1: Trial schema

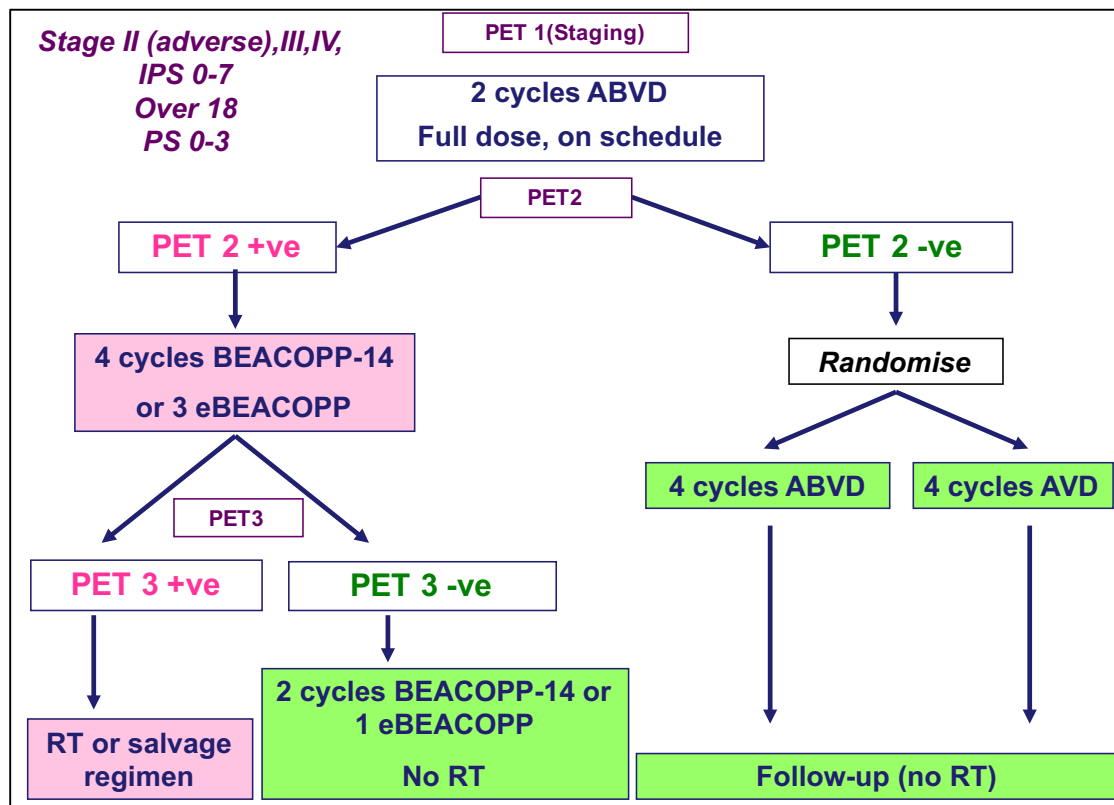

Figure S2: Progression-free and overall survival for all patients

Fig S2a: Progression free survival for all eligible patients.

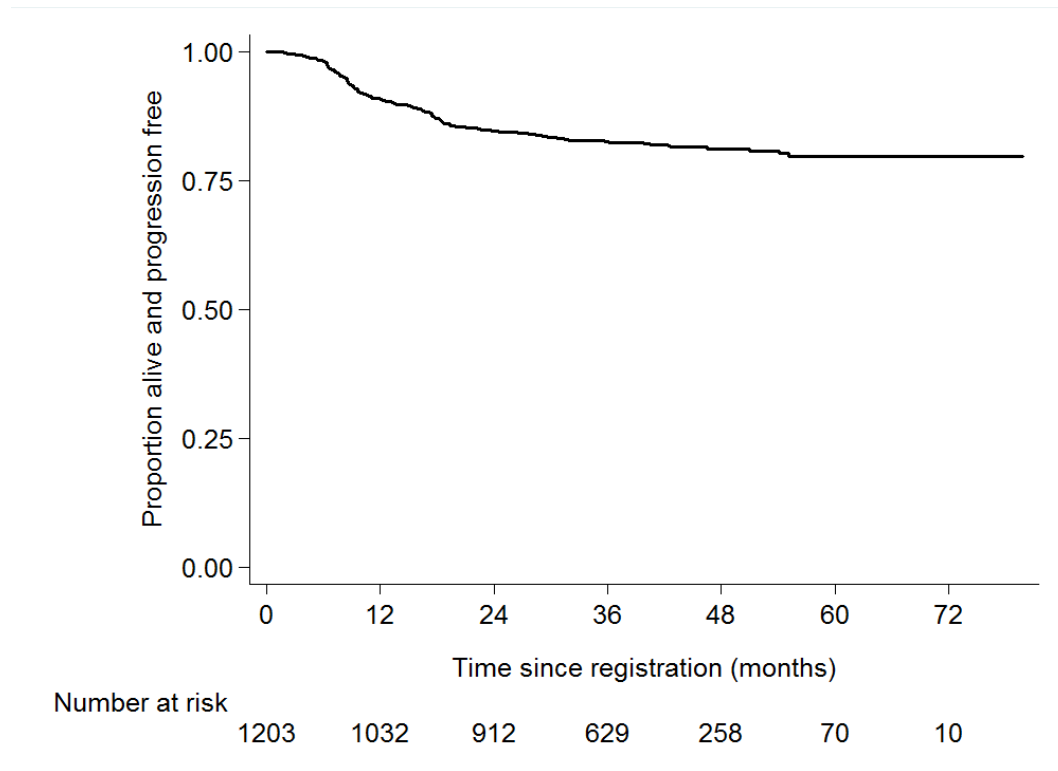

Fig S2b: Overall survival for all eligible patients.

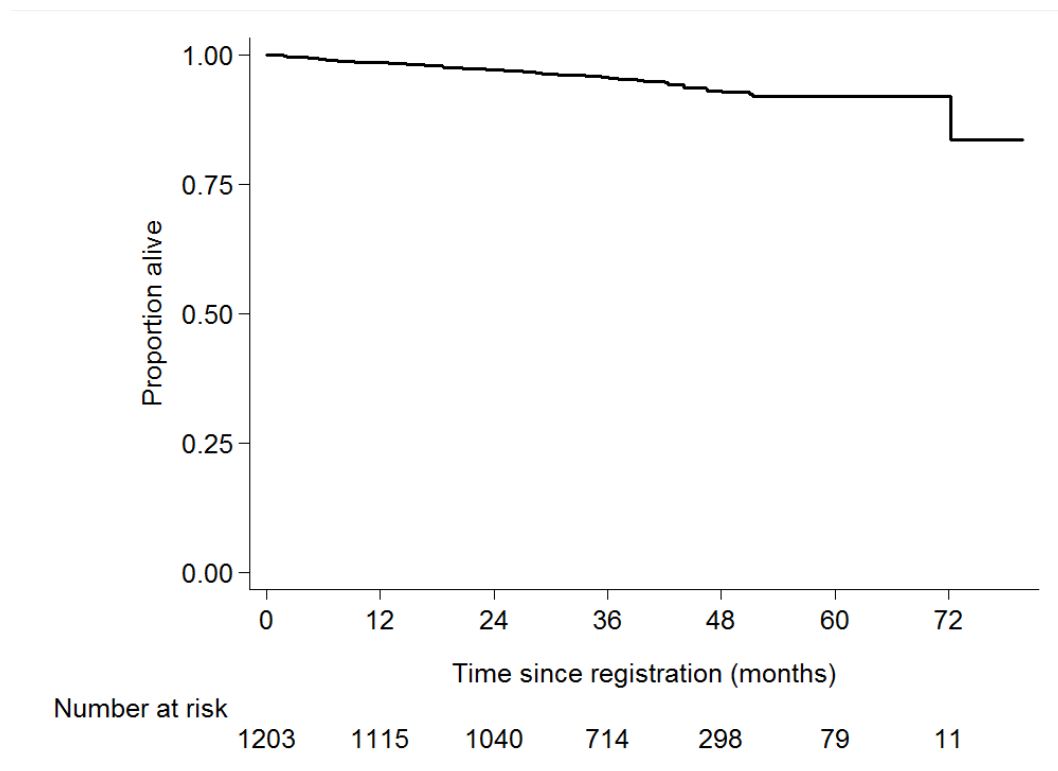

Figure S3: Subgroup analysis of the effects on progression-free survival of the omission of bleomycin following negative interim PET

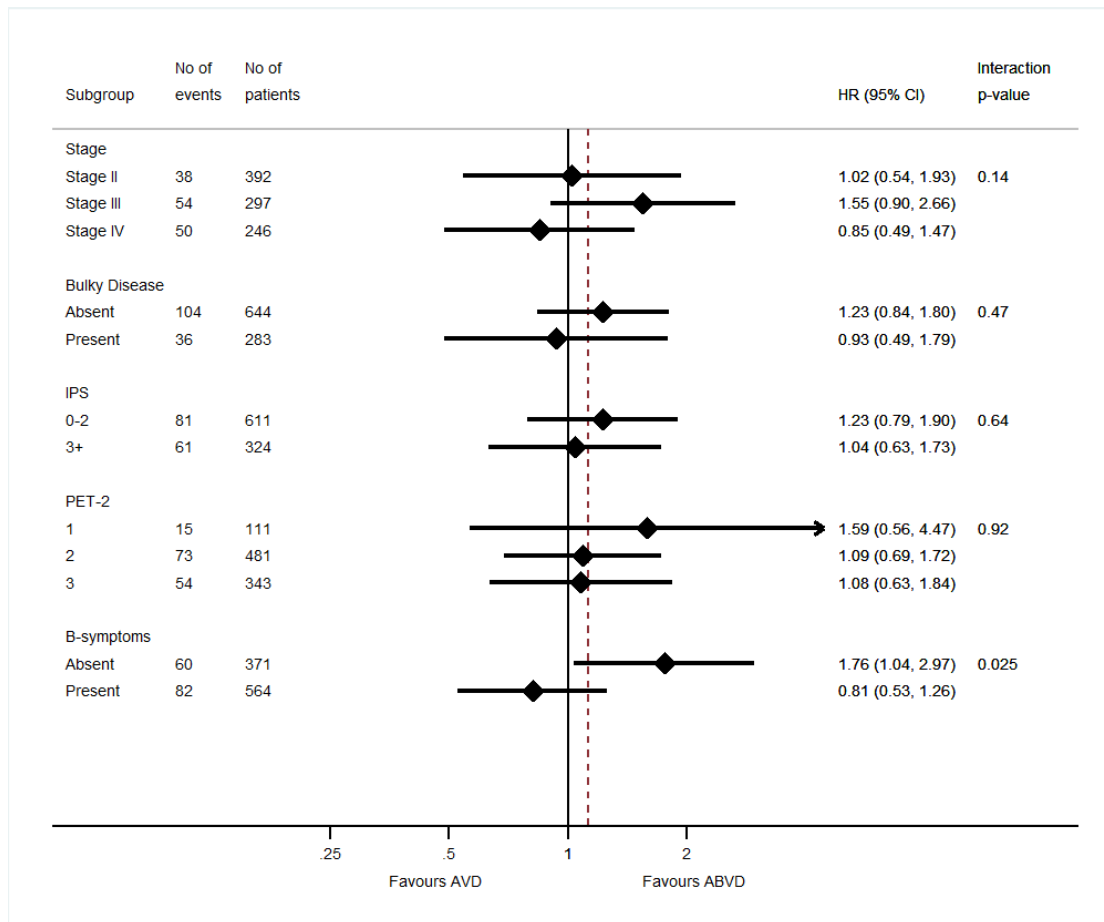

Table S1: Association of prognostic factors and progression-free survival following negative interim PET.

|                             |         | Events/n | Hazard ratio<br>(95% CI) | p      | 3 year PFS %       |
|-----------------------------|---------|----------|--------------------------|--------|--------------------|
| Stage                       | II      | 38/392   | 1.00                     | <0.001 | 90.0 (86.4 - 92.6) |
|                             | III     | 54/297   | 1.98(1.31-2.99)          |        | 83.1 (78.2 - 87.0) |
|                             | IV      | 50/246   | 2.18 (1.43-3.32)         |        | 79.6 (73.8 - 84.2) |
| IPS                         | 0-2     | 81/611   | 1.00                     | 0.029  | 86.9 (83.8 - 89.4) |
|                             | ≥3      | 61/324   | 1.44 (1.04-2.01)         |        | 81.7 (76.9 - 85.6) |
| Bulk                        | Absent  | 104/644  | 1.00                     | 0.20   | 84.0 (80.9 - 86.7) |
|                             | Present | 36/283   | 0.78 (0.54-1.14)         |        | 87.6 (83.1 - 91.0) |
| PET-2 score                 | 1       | 15/111   | 1.00                     | 0.77   | 88.1 (80.3 - 92.9) |
|                             | 2       | 73/481   | 1.11 (0.64-1.94)         |        | 84.9 (81.3 - 87.9) |
|                             | 3       | 54/343   | 1.21 (0.68-2.15)         |        | 84.4 (80.0 - 87.9) |
| B Symptoms                  | Absent  | 60/372   | 1.00                     | 0.47   | 84.2 (80.0 - 87.6) |
|                             | Present | 82/564   | 0.89 (0.63 - 1.24)       |        | 85.6 (82.3 - 88.3) |
| Age (for 10 year increase ) |         | 142/935  | 1.15 (1.03 - 1.29)       | 0.012  | -                  |



Table S2: Progression-free survival among 348 patients with stage II disease with a negative interim PET-CT scan and who did not receive consolidation radiotherapy, according to risk categories:

| Risk factor          |         | Number | %    | Events | 3 year PFS         |
|----------------------|---------|--------|------|--------|--------------------|
| Bulk                 | Present | 119    | 34.7 | 10     | 91.5 (84.8 – 95.3) |
|                      | Absent  | 224    | 65.3 | 18     | 91.7 (87.1 - 94.7) |
| B symptoms           | Present | 206    | 59.4 | 16     | 92.0 (87.3 – 95.0) |
|                      | Absent  | 141    | 40.6 | 13     | 90.6 (84.4 – 94.4) |
|                      |         |        |      |        |                    |
| B symptoms or bulk   | Present | 257    | 74.5 | 23     | 90.9 (86.6 – 93.8) |
|                      | Absent  | 88     | 25.6 | 5      | 94.1 (86.3 – 97.5) |
| Chemotherapy outcome | CR/CRu  | 258    | 74.4 | 20     | 92.0 (87.8 – 94.7) |
|                      | PR      | 89     | 25.7 | 9      | 89.8 (81.3 – 94.6) |

Table S3: recruitment by country

| Country      | N (%)      |
|--------------|------------|
| UK           | 854 (71.0) |
| Italy        | 128 (10.6) |
| Norway       | 75 (6.2)   |
| Australia/NZ | 84 (7.0)   |
| Sweden       | 51 (4.2)   |
| Denmark      | 11 (0.9)   |

Full list of sites and investigators:

**United Kingdom**

Aberdeen Royal Infirmary, Dr D Culligan; Addenbrookes Hospital, Dr G Follows; Arrowse Park Hospital, Dr R Dasgupta; Barnet Hospital, Dr A Virchis; Basildon Hospital, Dr J Howard; Birmingham Heartlands Hospital, Dr M Lumley; Bristol Oncology Centre, Dr S Robinson; Castle Hill Hospital, Dr R Patmore; Cheltenham General Hospital, Dr K Benstead; Christie Hospital, Professor J Radford; Churchill Hospital, Dr C Hatton; Countess of Chester Hospital, Dr S Tueger; Dorset County Hospital, Dr A Moosa; Falkirk & District Royal Infirmary, Dr M Hughes; Freeman Hospital, Dr A Lennard; George Eliot Hospital, Dr M Narayanan; Glan Clywd Hospital, Dr E Heartin; Great Western Hospital, Dr N Blesing; Guy's and St Thomas' Hospital, Dr P Fields; Harrogate Hospital, Dr Clare Hall; Hillingdon Hospital, Dr R Kaczmarek; Hinchingsbrooke Hospital, Dr S Nagumantry; Huddersfield Royal Infirmary, Dr S Feyler; Hammersmith Hospital, Dr D MacDonald; James Cook University Hospital, Dr R Dang; James Paget Hospital, Dr S Sadullah; Kent & Canterbury Hospital, Dr C Pocock; Kettering General Hospital, Dr M Lyttelton; Kings College Hospital, Dr A Pagliuca; Lincoln County Hospital, Dr G Anghel; Leicester Royal Infirmary, Dr F Miall; Manchester Royal Infirmary, Dr K Ryan; Mid Yorkshire NHS Trust, Dr P Moreton; Monklads Hospital, Dr A Raafat; Mount Vernon Hospital, Dr J Lambert; New Cross Hospital, Dr S Basu; Ninewells Hospital, Dr D Meiklejohn; Norfolk and Norwich University Hospital, Dr J Wimperis; North Hampshire Hospital, Dr A Milne; Northampton General Hospital, Dr A Bowen; Northwick Park Hospital, Dr C Kyriakou; Nottingham City Hospital, Dr A McMillan; Peterborough City Hospital, Dr S Nagumantry; Poole Hospital, Dr F Jack; Princess Royal University Hospital, Dr A Lakhani; Queen Alexandra Hospital, Dr A O'Callaghan; Queen's Hospital, Romford, Dr C Hemmaway; Queen Elizabeth Hospital, Dr R Malladi; Queen Elizabeth Hospital, Gateshead, Dr S Marshall; Queen Elizabeth Hospital, London, Dr I El-Hemaidi; Queen Mary's Hospital, Sidcup, Dr S Bowcock; Raigmore Hospital, Dr P Forsyth; Royal Alexandra Hospital, Dr A Sefcick; Royal Bournemouth Hospital, Dr R Hall; Royal Cornwall Hospital, Dr A Kruger; Royal Derby Hospital, Dr C Millar; Royal Devon & Exeter Hospital, Dr C Rudin; Royal Free Hospital, Dr C McNamara; Royal Liverpool Hospital, Dr N Kalakonda; Royal Marsden Hospital, Professor D Cunningham; Royal Oldham Hospital, Dr H Greenfield; Royal Preston Hospital, Dr A Biswas; Royal United Hospital, Dr J Crowe; Russells Hall Hospital, Dr J Neilson; Salisbury District Hospital, Dr J Cullis; Salford Royal Hospital, Dr S Jowitt; Southampton General Hospital, Professor P Johnson; Southend Hospital, Dr P Cervi; Southport and Formby District Hospital, Dr D O'Brien; St Bartholomew's Hospital, Dr S Montoto; St George's Hospital, Dr R Pettengell; St James's University Hospital, Leeds, Dr C Burton; St Richard's Hospital, Dr PC Bevan; Stafford Hospital, Dr P Revell; Stoke Mandeville Hospital, Dr AM O'Hea; Sunderland Royal Hospital, Dr S Lyons; The Beatson West of Scotland Cancer Centre, Dr P McKay; Torbay Hospital, Dr D Turner; University College London Hospital, Dr K Ardeshtna; University Hospital of Aintree, Dr B Hammer; University Hospital, Coventry, Dr B Harrison; University Hospital, Wales, Dr C Rowntree; University Hospital Lewisham, Dr N Mir; University Hospital of North Staffordshire, Dr R Chasty; University Hospital of North Tees, Dr P Mounter; Velindre Hospital, Dr E Gallop-Evans; Warwick Hospital, Dr A

Borg; Weston Park Hospital, Dr L Evans; West Suffolk Hospital, Dr M Karanth; Western General Hospital, Dr F Scott; Wexham Park Hospital, Dr S Moule; Worcestershire Royal Hospital , Dr S Shafeek; Worthing Hospital, Dr S Narat; York Hospital, Dr M Howard

### **Italy**

A.O. Universitaria S. Martino, Professor AM Carella; PO Vito Fazzi, Dr Di Renzo; Ospedale Madonna delle Grazie, Dr A Fragasso; Università degli Studi di Messina, Dr C Musolino; Azienda Ospedaliera 'Papardo', Dr. ssa Maura Brugiattelli; Università degli Studi di Modena e Reggio Emilia, Professor M Federico; Università degli Studi di Parma, Ospedale Maggiore , Professor Vittorio Rizzoli; Ospedale Guglielmo da Saliceto , Dr D Vallisa; Presidio Ospedali Riunti 'Bianchi, Melacrino, Morelli' , Professor Francesco Nobile; Azienda Ospedaliera Arcispedale 'S. Maria Nuova' , Dr F Merli; IRCCS Centro di Riferimento Oncologico della Basilicata, Dr P Musto; Azienda Ospedaliera Sant'Andrea, Dr C Cox; Casa Sollievo della Sofferenza di S. Giovanni Rotondo , Dr N Cascavilla; Nuovo Ospedale Civile, Dr. Giovanni Partesotti;

### **Norway**

Norwegian Radium Hospital, Dr Alexander Fossa; St. Olav's Hospital, Trondheim, Dr Unn-Merete Fagerli; Ullevål University Hospital, Dr Bjorn Ostenstad; University Hospital of North Norway Tromsø, Dr Hanne Bersvendsen

### **Sweden**

Norrlands University Hospital, Dr Beatrice Melin; Skane University Hospital, Dr Johan Linderöth; Sahlgrenska University Hospital, Dr Christina Goldkuhl; University Hospital, Linköping, Dr Ingemar Lagerlöf; Uppsala University Hospital, Dr Daniel Molin

### **Australia and New Zealand**

Auckland Hospital, NZ, Dr Leanne Berkahn; Border Medical Oncology, Dr Richard Eek; Cairns Base Hospital, Dr Ketan Bavishi; Canberra Hospital, Dr James D'Rozario; Frankston Hospital, Professor John Catalano; Peter MacCallum Cancer Centre, Dr Max Wolf; Prince of Wales Hospital, Dr Tim Brighton; Princess Alexandra Hospital, Prof Maher Gandhi; Queen Elizabeth Hospital, Dr Uwe Hahn; Royal Darwin Hospital, Dr Akash Kalro; Royal Hobart Hospital, Dr Rosemary Harrup; Royal North Shore Hospital, Dr Matthew Greenwood; Royal Prince Alfred Hospital, Dr Stephen Larsen; Sir Charles Gairdner Hospital, Dr David Joske; Western Hospital, Dr William Renwick; Westmead Hospital, Professor Mark Hertzberg

### **Denmark**

Aarhus University Hospital, Dr Francesco d'Amore
